# Supplementary material for: Protein structure-aided prediction of the phylogenetic ancestry of genes. The case of IGF system
Source: Research Square preprint supplement (doi:10.21203/rs.3.rs-7721753/v1), 2025-10-16
Supplement: Supplementary file 1 [file e5364797b5f559722cf6bffa.xlsx]

## Sheet: Table S1
Table S1: For the 21 elements of the insulin-like growth factor system, details of the queries (symbol, name, UniProt Id, PDB/AFDB Id, description, AA interval/chain, average pLDDT for AF2 model) and of their targets for most evolutionary distant species identified by FSS (AFDB Id, average pLDDT, name, species; for the match characteristics: TM-score, sequence identity %, E-value, aligned amino-a…
QUERY characteristics									FSS RESULTS: TARGET and MATCH characteristics										Specific comments in case of results only close to significativity
Symbol	Name (Ensembl Id)	UniProt Id (AA sequence lenght)	PDB or AFDB (v4) Id (by default human species)	Description	Interval (in AA), and chain (for complex)	For AFDB Id: average pLDDT (whole sequence )	Comment in case of low average pLDDT (AF2 model)		Target Id (AFDB v4)	Average pLDDT over the whole lenght (AF2 model)	Name	Species	TM	Sequence identity (%)	E-value (significant when < 0.05; in bold)	Aligned amino acids in query	Aligned amino acids in target	Average pLDDT calculated for aligned AA in target
INS	insulin (ENSG00000254647)	P01308 (110)	PDB 2KQP (others available)	Nmr structure of proinsulin	25-110	/			AF-Q9VT52-F1	71.5	Probable insulin-like peptide 3	Drosophila melanogaster	0.45	23.1	3.38e-2	2-86	29-115	70.1	Numerous experimental 3D structures of the mature INS are available, including complexes (see https://www.uniprot.org/uniprotkb/P01308/entry). Mature INS consists in discrete A- and B- domains, from which a connecting (C-) domain is excised by proteases. FSS using as query PDB 2KQP, which corresponds to the non-cleaved proinsulin (including the A-,B- and C-domains), led to a significant match (E-…
			AF-P01308-F1	/	1-110	53.1	The AF2 model corresponds to the whole INS sequence, including the signal peptide and the propeptide, whereas the mature INS folds as two distinct segments (A- and B- domains) derived from the propeptide by cleavage of a C-domain. The two segments are linked by disulfide bridges (whereas in IGF-I/II, the same two peptides linked by disulfide bridges are separated by a specific loop, which is not …		not usable (average pLDDT on the A- and B domains < 70)
			→ BLASTP 1 in Table S2									Ecdyzosoa
IGF-II	insulin like growth factor 2 (ENSG00000167244)	P01344 (180)	PDB 1IGL	Solution structure of human insulin-like growth factor ii relationship to receptor and binding protein interactions	25-91	/			AF-A0A0J7KQ37-F1	70.4	Insulin-like growth factor i protein	Lasius niger	0.59	36.3	1.9e-2	6-67	42-106	77.7	Non-significant E-values are explained by limited sequence similarity. Low TM score in D melanogaster is due to a variable loop separating the the two conserved segments (A- and B- peptides) linked by disulfide bridges (Fig. 3).
									AF-Q7JP91-F1	71.2	INSulin related	Caenorhabditis elegans	0.56	15.7	8.48e-1	5-61	67-114	84
									AF-Q9VT52-F1	71.5	Probable insulin-like peptide 3	Drosophila melanogaster	0.43	20.8	1.10e-1	1-66	26-120	65.4
			AF-P01344-F1	/	1-180	59.3	no additional domain with pLDTT≥ 70 outside PDB		not usable (average pLDDT on the A- and B domains < 70)
			→ BLASTP 2 in Table S2									Ecdyzosoa
IGF-I	insulin like growth factor I (ENSG00000017427)	P05019 (195)	PDB 1B9G	Insulin-like-growth-factor-1 (mini IGF-I)	49-118	/			AF-P56173-F1	72.3	Putative insulin-like peptide beta-type 6	Caenorhabditis elegans	0.42	25.5	2.34e+0	6-52	54-100	86.3	Situation similar to that observed with IGF-II. Non-significant E-value is explained by limited sequence similarity while low TM score is due to a variable loop separating the the two conserved segments (A- and B- peptides) linked by disulfide bridges, but also to a rearrangement in the 3D structure core in mini IGF-I (pdb 1B9G) relative to the wild type IGF-I and insulin (De Wolf et al. 1996) (F…
			PDB 3LRI	Solution structure and backbone dynamics of long-[Arg(3)]insulin-like growth factor-I	49-118	/			AF-A0A0N4UGH3-F1	66.4	Uncharacterized protein	Dracunculus medinensis	0.41	26.4	3.24+0	7-79	1-73	61.5
				/	1-195	59.9	no additional domain with pLDTT≥ 70 outside PDB		not usable (pLDDT < 70)
			→ BLASTP 3 in Table S2									Ecdyzosoa
INSR	insulin receptor (ENSG00000171105)	P06213 (1382)	PDB 7PG4	Low resolution cryo-EM structure of the full-length insulin receptor bound to 2 insulin, conf 3	1-1382	/			AF-Q9VJ04-F1	80	Receptor protein-tyrosine kinase	Drosophila melanogaster	0.625	24.5	3.18e-39	4-785	26-834	84.4
IGF type 1 receptor	insulin-like growth factor 1 receptor (ENSG00000140443)	P08069 (1367)	PDB 1P4O	Structure of apo unactivated igf-1r kinase domain at 1.5Å resolution	974-1294	/			AF-P09208-F1	59.6	Insulin-like receptor	Drosophila melanogaster	0.84	62.1	1.23e-36	1-307	1350-1669	72.7	The low average pLDDT of the full length target AF-P09208 in Drosophila is due to low pLDDT values outside the seven domains whose 3D structures were experimentally determined (pdb 14PO), which were well superimposed between the query and target (Table S4)
			AF-P08069-F1	/	1-1367	78							0.55	33	0.00e+0	9-1367	304-1773	72.7
			→ BLASTP 4 in Table S2									Drosophila melanogaster
IGF type 2 receptor (IGF-II/CIM6PR)	insulin like growth factor 2 receptor (ENSG00000197081)	P11717 (2491)	PDB for various domains									Drosophila melanogaster							See Table S3 for results obtained using as query different domains of the protein
IGFBP-1	insulin-like growth factor binding protein 1 (ENSG00000146678)	P08833 (259)	PDB 2DSQ	Structural basis for the inhibition of insulin-like growth factors by igf binding proteins	chain G (166-259)	/			AF-Q8JHX6-F1	76.4	Insulin-like growth factor-binding protein 1	Danio rerio	0.67	38.2	5.72e-6	2-72	180-258	88	Using as query the experimental (PDB) 3D structure of IGFBP-1 limited to its C-terminal domain (AA 166-259), we identified a homolog in Danio rerio but not in Agnatha (Hagfish/Lamprey)
			AF-P08833-F1	/	1-259	79.3			AF-S4RH61-F1	68.4	Insulin-like growth factor-binding protein 1	Petromyzon marinus	0.32	29.7	1.61e-18	1-251	4-286	69.2	A significant relationship was highlighted with the sea lamprey homolog (E-value<0.05). TM are below the threshold value, due to the variable linkers between the two N- and C-terminal domains, which are well superimposed (not shown). This linker is also responsible for lowering the average pLDDT value calculated over the alignement length
			→ BLASTP not shown									no IGFBP-1 homolog in Agnatha							BLASTP search restricted to Agnatha protein sequences, using as query the human protein sequence, was ineffective to identify an homolog in these species (not shown), probably due to low sequence similarity especially in the linker region (and/or to lacunar genome annotation in this species)
IGFBP-2	insulin-like growth factor binding protein 2 (ENSG00000115457)	P18065 (325)	PDB 2H7T	Solution structure of the C-terminal domain of insulin-like growth factor binding protein 2 (igfbp-2)	220-235	/			AF-B3F211-F1	71.1	Insulin-like growth factor-binding protein 2-B	Danio rerio	0.55	54.8	7.45e-7	2-105	162-265	77.5	The low pLDDT of the AF2 model of the target AF-A0A4W3J799-F1 is due to the varibale linkers between the two N- and C-terminal domains. The most distant species found with FSS is Callorhichus and Petromyzon with BLASTP. Petromyzon marinus IGFBP-2 (XP_032801029.1) is included in the UniProt database (A0AAJ7SKZ8), but the AF2 model was not available. Its domain characteristics are, AA 31-114: IGFBP…
			AF-P18065-F1	/	1-325	66.6	Confident prediction for the N- (AA 48-118, pLDDT=91.6) and C-(AA 207-220/230-298, pLDDT=76.75) domains, separated by a linker with low pLDDT		AF-A0A4W3J799-F1	67.4	Thyroglobulin type-1 domain-containing protein	Callorhinchus milii	0.52	53.8	2.55e-12	135-287	1-150	67.4
			→ BLASTP 6 in Table S2									Petromyzon marinus
IGFBP-3	insulin like growth factor binding protein 3 (ENSG00000146674)	P17936 (291)	PDB 7WRQ	Structure of human igf1/igfbp3/als ternary complex	chain B (28-291)	/			AF-Q66I28-F1	70.4	Insulin-like growth factor-binding protein 3	Danio rerio	NA	43	7.98e-16	2-167	23-290	70	Significant E-value due to high similarity with the two conserved N- and C- domains, TM are below the threshold value (or not available - NA), due to the variable linkers between the two N- and C-terminal domains, which are well superimposed (this linker is also responsible for lowering the average pLDDT values).
			AF-P17936-F1	/	1-291	67.9	Confident prediction for the N- (AA 44-126, pLDDT=90.756) and C- (AA 208-278, pLDDT=81.2) domains, separated by a linker with low pLDDT		AF-S4RHZ7-F1	63.1	Insulin-like growth factor-binding protein 3	Petromyzon marinus	0.34	44.9	1.62e-23	1-274	6-276	61
			→ BLASTP 7 in Table S2									Petromyzon marinus							Domain characteristics of Petromyzon IGFBP-3 (AF-S4RHZ7-F1) are, AA 52-133: IGFBP N-terminal domain; AA 230-304: thyroglobulin type-1 domain (https://www.uniprot.org/uniprotkb/A0A1Q1NIC3/entry)
IGFBP-4	insulin like growth factor binding protein 4 (ENSG00000141753)	P22692 (258)	PDB 1WQJ	Structural basis for the regulation of insulin-like growth factors (igfs) by igf binding proteins (igfbps)	24-103	/			AF-A0A444UBU7-F1	72.75	Insulin-like growth factor-binding protein 4	Acipenser ruthenus	0.96	78.4	1.42e-12	1- 79	24-102	95.3
									AF-A0A4W3HIT4-F1	50.3	Insulin-like growth factor-binding protein 4	Elephant shark (Callorhinchus milii)	0.96	72.1	4.08e-11	1- 79	351-429	90.9
			AF-P22692-F1	/	1-258	77.4			AF-A0A444UBU7-F1	72.75	Insulin-like growth factor-binding protein 4	Acipenser ruthenus	0.47	57	4.47e-24	1-212	6-209	75	Significant E-value due to high similarity with the two conserved N- and C- domains, TM are below the threshold value, due to the variable linkers between the two N- and C-terminal domains, which are well superimposed (this linker is also responsible for lowering the average pLDDT values).Note that this homolog as also found starting with the experimental 3D structure, limited to the N-terminal d…
			→ BLASTP 8 in Table S2									Elephant shark (Callorhinchus milii)							Callorhinchus milii IGFBP-4 identified by BLASTP is XP_007899760.1 that is linked to UniProt V9L7N1 (https://www.uniprot.org/uniprotkb/V9L7N1/entry), whereas FSS led to identify AF-A0A4W3HIT4-F1 (https://www.uniprot.org/uniprotkb/A0A4W3HIT4/entry). Both proteins are encoded by the gene LOC103183854. This may be due to discrepancies between NCBI and Uniprot databanks, related to approximative anno…
IGFBP-5	insulin like growth factor binding protein 5 (ENSG00000115461)	P24593 (272)	PDB 1H59	Complex of IGFBP-5 with IGF-I	chain B (60-112)	/			AF-F6QEK5-F1	75	Uncharacterized protein	Ciona intestinalis	0.85	38.6	1.31e-3	2-45	64-106	88.1
									AF-A0A6P4Y511-F1	73.3	insulin-like growth factor-binding protein 5	Branchiostoma belcheri	0.91	56.8	1.87e-4	2-45	64-106	97
			AF-P24593-F1	/	1-272	76			AF-F6QEK5-F1	75	Uncharacterized protein	Ciona intestinalis	0.37	30.1	2.75e-16	3-263	29-250	77	Significant E-value due to high similarity with the two conserved N- and C- domains, TM are below the threshold value, due to the variable linkers between the two N- and C-terminal domains, which are well superimposed (this linker is also responsible for lowering the average pLDDT values). Note that this homolog was also found starting with the experimental 3D structure, limited to the N-terminal…
			→ BLASTP 9 in Table S2									Branchiostoma belcheri							Domain characteristics of Branchiostoma belcheri IGFBP-5 are, AA 24-104: IGFBP N-terminal domain;AA 227-294: Throglobulin type-1 domain (https://www.uniprot.org/uniprotkb/A0A6P4Y511/entry)
IGBBP-6	insulin like growth factor binding protein 6 (ENSG00000167779)	P24592 (240)	PDB 1RMJ	C-terminal domain of insulin-like growth factor (IGF) binding protein-6: structure and interaction with IGF-II	161-240	/			AF-F6N9E8-F1	73.25	Insulin-like growth factor-binding protein 6b	Danio rerio	0.62	52.1	2.22e-5	23-91	131-199	83.8
									AF-A0A2R8QKX9-F1	76.4	Insulin-like growth factor-binding protein 6a	Danio rerio	0.57	47.2	1.02e-4	26-95	117-188	84.5
									AF-F6QHE7-F1	82.5	Uncharacterized protein	Ciona intestinalis	0.52	26.7	1.09e+0	23-90	21-88	84.6	TM < 0.5 but: False positive (similarity limited to the C-domain (thyroglobulin type 1), with no signifiant E-value) (Fig. 2)
			AF-P24592-F1	/	1-240	69.7	Confident prediction for the N- (AA 70-107, pLDDT=94.9) and C- (163-215, pLDDT=85.0) domains, separated by a linker with low pLDDT		AF-F6QEK5-F1	75	Uncharacterized protein	Ciona intestinalis	0.42	24.6	2.98e-11	63-236	63-225	74.5	Significant E-value due to high similarity with the two conserved N- and C- domains, TM are below the threshold value, due to the variable linkers between the two N- and C-terminal domains, which are well superimposed (this linker is also responsible for lowering the average pLDDT values) (Fig. 2)
			→ BLASTP 10 in Table S2									Bony fishes. No IGFBP-6 in Callorihinus milii, Petromyzon, Ciona intestinalis (not shown)
ALS	insulin like growth factor binding protein acid labile subunit (ENSG00000099769)	P35858 (605)	PDB 7WRQ	Structure of human igf1/igfbp3/als ternary complex	chain A (28-605)	/			AF-Q18902-F1	84.5	ELRR (Extracellular Leucine-Rich Repeat) Only	Caenorhabditis elegans	0.82	21.7	1.91e-11	6-500	51-667	94.6
									AF-Q0KHN6-F1	71.8	Uncharacterized protein, isoform C	Drosphila melanogaster	0.73	26.5	3.34e-13	32-500	394-904	92.4
									AF-A0A6B1FC20-F1	85.6	Uncharacterized protein	Gemmatimonadetes bacterium	0.60	26.7	4.97e-8	140-531	251-644	95.4
IMPL2 (drosphila)	Drosophila Ecdysone-inducible gene L2 FBgn0001257	Q09024 (267)	PDB 6FEY	Crystal structure of drosophila neural ectodermal development factor imp-l2 with drosophila dilp5 insulin	26-267	/			AF-G5ECB1-F1	91.5	Zwei Ig domain protein zig-4	Caenorhabditis elegans	0.76	24.5	6.45e-16	2-196	45-249	95
PAPP-A	pappalysin 1 (ENSG00000182752)	Q13219 (1627)	PDB 7UFG	Cryo-em structure of papp-a in complex with igfbp5	81-1627	/			AF-A0A0G2KQH4-F1	78.4	Pregnancy-associated plasma protein A, pappalysin 1a	Danio rerio	0.78	55.9	0.00e+0	1-1151	87-1340	81.9	Fig 6
									AF-F1Q5Q4-F1	79.4	Pregnancy-associated plasma protein A, pappalysin 1b	Danio rerio	0.78	56.3	0.00e+0	2-1151	85-1336	83.4
									AF-A0A077YXQ0-F1	70.3	Laminin G 3 and Notch and Sushi and Peptidase M43 domain containing protein	Trichuris trichiura	0.59	29.6	1.38e-99	2-1151	79-1359	75.3
PAPP-A2	pappalysin 2 (ENSG00000116183)	Q9BXP8 (1791)	PDB 8SL1	Cryo-em structure of papp-a2	235-1791	/			AF-E9QCK7-F1	74.6	Pregnancy-associated plasma protein A, pappalysin 2	Danio rerio	0.90	50.8	0.00e+0	2-842	228-1122	84.1	Fig 6
									AF-A0A077YXQ0-F1	70.3	Laminin G 3 and Notch and Sushi and Peptidase M43 domain containing protein	Trichuris trichiura	0.76	32.8	7.27e-83	2-842	77-1026	76.3
PROMBP/BMPG	proteoglycan 2, pro eosinophil major basic protein (ENSG00000186652)	P13727 (222)	PDB 7Y5N	Structure of 1:1 papp-a.Prombp complex(half map)	1-222	/			AF-Q18821-F1	88.65	C-type lectin domain-containing protein	Caenorhabditis elegans	0.88	30.1	3.314e-8	14-136	23-145	96.5
									AF-A1ZB48-F1	91.5	FI01427p	Drosophila melanogaster	0.69	20.9	2.95e-6	9-135	27-166	92.7
STC1	stanniocalcin 1 (ENSG00000159167)	P52823 (247)	AF-P52823-F1 (no PDB)	/	1-247	78.3			AF-F7B7V5-F1	80.6	Uncharacterized protein	Ciona intestinalis	0.68	21.8	2.31e-9	6-247	25-234	83.5
									AF-A0A820TK68-F1	78.8	Hypothetical protein	Rotaria socialis (Lophotrochozoa)	0.60	18.2	1.62e-2	41-197	259-425	80.2
STC2	stanniocalcin 2 (ENSG00000113739)	O76061 (302)	PDB 8HGH	Structure of 2:2 papp-a.Stc2 complex	chain C (1-302)	/			AF-Q09EE8-F1	84.65	Uncharacterized protein	Caenorhabditis elegans	0.60	17.1	5.43e-3	11-148	26-159	90.1
GH	growth hormone (ENSG00000259384)	P01241 (217)	PDB 1HGU	Human growth hormone	27-217	/			AF-Q8AUU3-F1	64.4	Growth hormone	Petromyzon marinus	0.64	23.2	4.93e-2	6-179	32-195	67.4
			AF-P01241-F1	/	1-217	80.3							0.59	22.9	1.88e-5	1-217	1-203	64.4
			→ BLASTP 11 in Table S2									Petromyzon marinus
GHR	growth hormone receptor (ENSG00000112964)	P10912 (638)	PDB 1A22	Human growth hormone bound to single receptor	chain B (19-256)	/			AF-A0A678UEC7-F1	53.2	Prolactin receptor	Petromyzon marinus	NA	30.9	3.26e-17	6-189	57-253	89.7
			AF-P10912-F1	Growth hormone receptor	1-638	58	long C-terminal disordered, no additional domain with pLDTT≥ 70 outside PDB		not usable (pLDDT < 70)
			→ BLASTP 12 in Table S2									Petromyzon marinus

## Sheet: Table S2
Table S2 : BLASTP (NCBI) searches against nr (non-redundant) protein sequence database: significant results for proteins as listed in Table S1. Q=query. Grey cells: reciprocal BLASTP searches
name	species	Total score	Query cover	E-Value	% Id	Target lenght	accession number
BLASTP 1: INS
Q: Human insulin; Blastp excluding Vertebrata (taxid:7742)
insulin-like	Argiope bruennichi	52.8	0.98	0.000008	34.5	118	XP_055953494.1
Q: Argiope insulin XP_055953494.1; Blastp in Drosophila melanogaster and Caenorhabditis
insulin-like peptide 2	Drosophila melanogaster	44.7	0.77	0.00005	27	137	NP_524012.1
insulin-like peptide 3	Drosophila melanogaster	38.9	0.59	0.001	38	120	NP_648360.2
Unnamed protein product	Caenorhabditis bovis	37	0.86	0.006	31.6	111	CAB3409430.1
Comment: by excluding vertebrate clade, BLASTP gave significant alignment with a protein named insulin-like found in the spider Argiope bruennichi (Table S2), this sequence exhibiting a significant similarity with insulin-like peptides 2 and 3 in Drosophila melanogaster and with an unnamed protein product in Caenorhabditis elegans.
BLASTP 2: IGF-II
Q: Human IGF-II; Blastp in Ecdysozoa (taxid:1206794)
Insulin-like growth factor II	Cyphomyrmex costatus	55.8	0.66	4e-07	28.77%	203	KYM93903.1
Insulin-like growth factor II	Trichinella spiralis	41.6	0.47	0.002	27.55%	124	NP_524012.1
BLASTP 3: IGF-I
Q: Human IGF-I; Blastp in Ecdysozoa (taxid:1206794)
insulin-like growth factor I isoform X1	Cataglyphis hispanica	63.5	0.9	1e-09	28.96	228	XP_050445533.1
IlGF domain-containing protein	Aphelenchoides besseyi	42.4	0.44	0.001	30.48	128	KAI6221138.1
BLASTP 4: IGF1R
Q: Human IGF1R; Blastp excluding Vertebrata (taxid:7742)
insulin-like peptide receptor	Lineus longissimus	1097	0.92	0.0	45.5%	1456	XP_064650847.1
insulin-receptor	Blattella germanica	1063	0.92	0.043	0.73	1403	CDI30232.1
Q: Blatella insulin-receptor CDI30232.1; Blastp in Drosophila melanogaster
insulin-like receptor	Drosophila melanogaster	911	0.91	0.040	0.32	3148	CAY93031.1
BLASTP 6: IGFBP-2
Q: Human IGFBP-2; Blastp excluding Gnathostomata (taxid:7776)
insulin-like growth factor-binding protein 2	Petromyzon marinus	199	0.88	2e-57	42.44%	338	XP_032801029.1
Q: Petromyzon marinus IGFBP-2 XP_032801029.1; reciprocal Blastp in Human (taxid:9606) → first alignment
insulin-like growth factor-binding protein 2	Homo sapiens	188	0.84	6e-56	41.39%	328	AAA36048.1
BLASTP 7: IGFBP-3
Q: Human IGFBP-3; Blastp excluding Gnathostomata (taxid:7776)
insulin-like growth factor-binding protein 3	Petromyzon marinus	209	0.99	6e-63	47.08%	310	XP_032819925.1
Q: Petromyzon marinus IGFBP-3 XP_032819925.1; reciprocal Blastp in Human (taxid:9606) → first alignment
insulin-like growth factor-binding protein 3	Homo sapiens	246	0.83	1e-79	49.24%	270	KAI4013757.1
BLASTP 8: IGFBP-4
Q: Human IGFBP-4; Blastp in cartilagineous fish (taxid:7777)
insulin-like growth factor-binding protein 4	Callorhinchus milii	248	0.94	3e-81	52.02%	270	XP_007899760.1
Q: Callorhinchus milii IGFBP-4 XP_007899760.1; reciprocal Blastp in Human (taxid:9606) → first alignment
insulin-like growth factor-binding protein 4	Homo sapiens	248	0.92	4e-81	52.02%	278	AAA62670.1
BLASTP 9: IGFBP-5
Q: Human IGFBP-5; Blastp excluding Vertebrata (taxid:7742)
Predicted: insulin-like growth factor-binding protein 5	Branchiostoma belcheri	140	0.9	2e-35	35.09%	306	XP_019624115.1
Q: Branchiostoma belcheri IGFBP-5 XP_019624115.1; reciprocal Blastp in Human (taxid:9606) → first alignment
insulin-like growth factor-binding protein 5 precursor	Homo sapiens	149	0.89	5e-42	35.09%	272	CAG33090.1
BLASTP 10: IGFBP-6
Q: Human IGFBP-6; Blastp in Gnatostoma (taxid:7776) excluding Tetrapoda (taxid: 32523)
insulin-like growth factor-binding protein 6a	Alosa sapidissima	135	0.98	7e-37	38.43%	208	XP_041945459.1
Q: Alosa s IGFBP-6 XP_041945459.1; reciprocal Blastp in Human (taxid:9606) → first alignment
insulin-like growth factor-binding protein 6	Homo sapiens	133	0.66	1e-37	43.98%	238	KAI2565898.1
Q: Human IGFBP-6; Blastp in spotted gar (taxid:7776)
insulin-like growth factor-binding protein 6b	Lepisosteus oculatus	118	0.7	2e-32	41.92%	219	XP_015199529.1
Q: Lepisosteus oculatus IGFBP-6 XP_015199529.1; reciprocal Blastp in Human (taxid:9606) → first alignment
insulin-like growth factor-binding protein 6	Homo sapiens	122	0.69	2e-33	42.77%	238	KAI2565898.1
BLASTP 11: GH
Q: Human GH; Blastp excluding Gnathostomata (taxid:7776)
somatotropin-like isoform X2	Petromyzon marinus	63.5	0.96	5e-08	26.89%	202	XP_032835209.1
Q: Petromyzon marinus somatotropin-like isoform X2 XP_032835209.1; reciprocal Blastp in Human (taxid:9606) → first alignment
Chain A, prolactin	Homo sapiens	59.7	0.86	6e-10	25.13%	199	1RW5A
BLASTP 12: GHR
Q: Human GHR; Blastp excluding Gnathostomata (taxid:7776)
growth hormone receptor	Petromyzon marinus	124	0.46	2e-25	29.50%	734	QHX35240.1
Q: Petromyzon marinus GHR QHX35240.1; reciprocal Blastp in Human (taxid:9606) → first alignment
growth hormone receptor	Homo sapiens	142	0.42	4e-34	29.75%	616	KAI4021133.1

## Sheet: Table S3
Table S3: Five of the longest human IGF-II/CIM6PR domains for which an experimental 3D structure has been solved and covering 70% of the receptor were searched for structural similary using FSS; mean pLDDT values calculated in the interval of aligned sequences in the target are indicated in the last column. Below the table is shown the AF2 3D structure model of their common target (average pLDDT …
human IGF-II/CIM6PR domains (UniProt P11717)			FSS RAW RESULTS								AFDB
PDB Id	title	interval	Target	name	species	TM-score (significant when > 0.5; in bold)	seq ID	E-value	Aligned amino acids (query)	Aligned amino acids (target)	pLDDT (calculated for aligned AA in target)
6P8I	N-terminal 5 domains of IGFIIR	36-763 (728)	AF-A0A0B4KH68-F1-model_v	Lysosomal enzyme receptor protein, isoform E (Lerp)	Drosophila melanogaster	0.41	18.2	3.48e-30	3-662	68-782	84
6Z31	Human cation-independent mannose 6-phosphate/ igf2 receptor domain 8	1082-1220 (139)	"	"	"	0.72	24	2.88e-8	1-139	201-340	88.5
6Z30	Human cation-independent mannose 6-phosphate/ igf2 receptor domains 9- 10	1222-1510 (289)	"	"	"	0.41	23.2	2.55e-17	1-283	349-700	80.5
1E6F	Human MIR-receptor, repeat 11	1508-1650 (143)	"	"	"	0.55	28.8	7.65e-9	1-129	349-479	78.7
2V5N	Structure of human igf2r domains 11-12	1508-1799 (292)	"	"	"	0.42	27.9	4.48e-18	7-271	356-661	78.9
			AF-A0A0B4KH68-F1			The pLDDT score corresponding to the 918 residues: 75.1 (confident)
						pLDDT < 50	very low
						50 < pLDDT < 70	low
						70 < pLDDT < 90	high
						90 < pLDDT	very high
				confidence

## Sheet: Table S4
Table S4: Description of TED (The Encyclopedia Domains) in AFDB for IGF1R and its target in Drosophila
domain#	Human IGF1R		Drosophila insulin-like-receptor
	AF-P08069-F1-v4		AF-P09208-F1-v4
	Boundaries	average pLDDT	Boundaries	average pLDDT
1	33-215	88.15	332-490/513-531	83.95
2	254-328	86	645-805	83.35
3	332-467	89.7	808-926	78.65
4	491-606	84	929-972/1123-1200	80.8
5	616-678/775-825	88	1216-1232/1240-1312	81.8
6	840-925	91.7	1356-1454	80
7	985-1082	82	1459-1684	83.1
8	1086-1285	83.05	/	/
